# Supplementary material for: Porous superabsorbent composites prepared from aqueous foam template and application evaluation
Source: Royal Society of Chemistry journal article supplement (doi:10.1039/d3sm01455j), 2024-01-01
Supplement: d3sm01455j1.pdf [file d3sm01455j1.pdf]

## Supporting information

### **Porous superabsorbent composites prepared from aqueous foam templates and application evaluation**

Yan Liu <sup>a, b</sup>, Fangzhi Duan <sup>a</sup>, Yongfeng Zhu <sup>a\*</sup>, Li Zong <sup>a</sup>, Xincun Wang <sup>b</sup>, Aiqin Wang <sup>a</sup>,

\*

<sup>a</sup> *Key Laboratory of Clay Mineral Applied Research of Gansu Province, Center of Eco-material and Green Chemistry, Lanzhou Institute of Chemical Physics, Chinese Academy of Sciences, Lanzhou, 730000, P.R. China*

<sup>b</sup> *Laboratory of Eco-Environment-Related Polymer Materials, Ministry of Education, Key Laboratory of Polymer Materials, College of Chemistry and Chemical Engineering, Northwest Normal University, Lanzhou, Gansu 730070, PR China*

---

\* Corresponding authors: aqwang@licp.cas.cn (A.Q. Wang). Tel.: +86 931 4968118,

Fax: +86 931 4968019; zhuyf@licp.cas.cn (Y.F. Zhu). Tel.: +86 931 4968120.

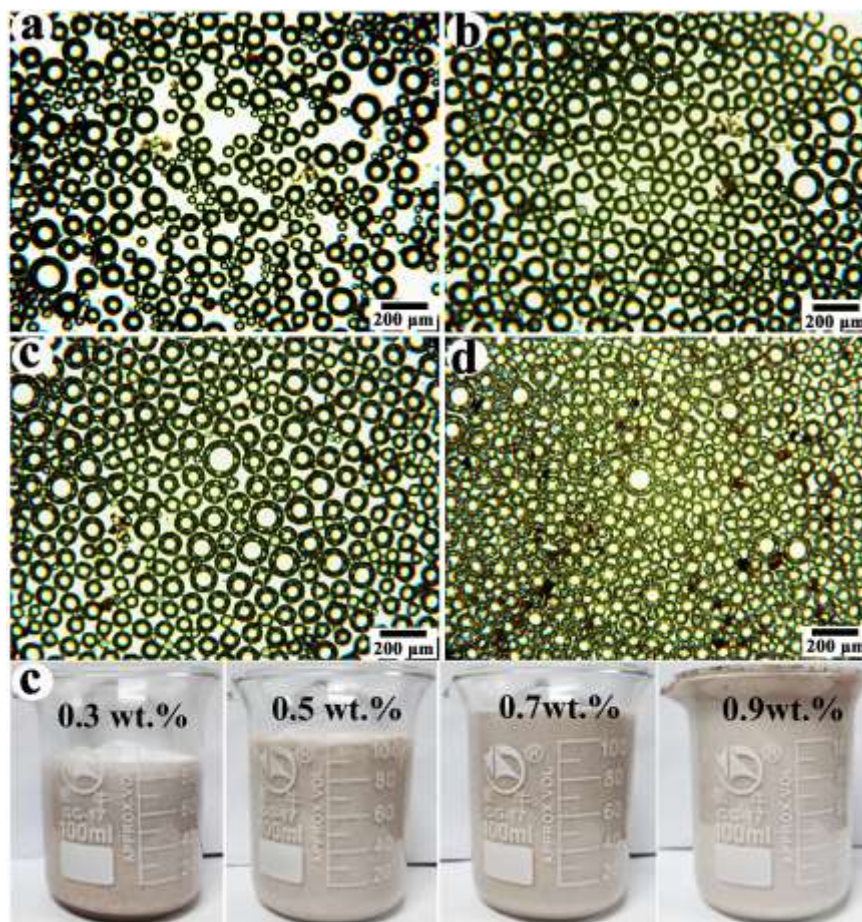

**Fig. S1** Optical microscope pictures of foam stabilized by 3 % COSSC and different concentrations of SMP (a) 0.3 wt.%, (b) 0.5 wt.%, (c) 0.7 wt.%, (d) 0.9 wt.%.

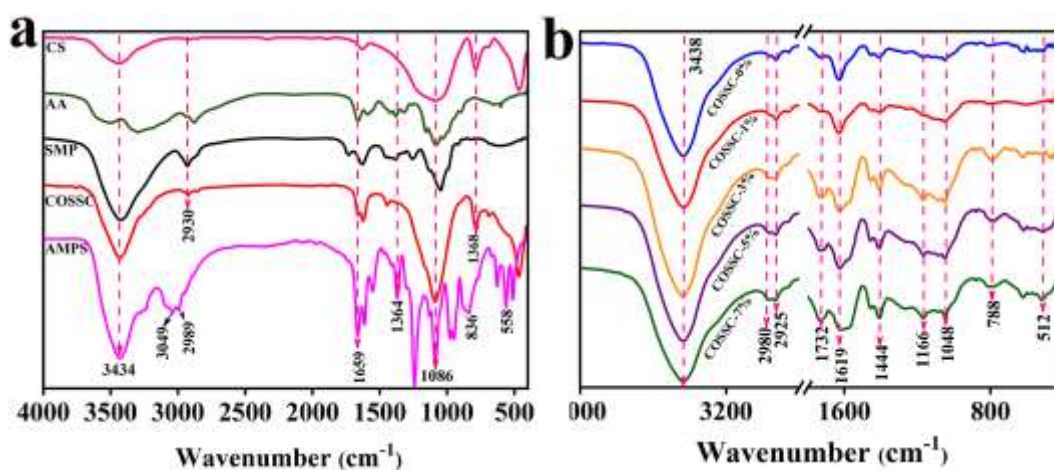

**Fig. S2** FTIR of CS, AA, AMPS, COSSC, SMP, and CS-g-P(AA-co-AMPS)/SMP/COSSC (0 - 7%).

The chemical composition and structure of porous superabsorbent were further revealed by FTIR analysis. As can be seen from Fig. S2, the characteristic absorption peaks such as -OH group ( $3434\text{ cm}^{-1}$ ), stretching vibration peak of  $-\text{CH}_2$  ( $2989\text{ cm}^{-1}$ ), the symmetric and antisymmetric vibration peaks of  $-\text{COO}^-$  ( $1640\text{ cm}^{-1}$ ) in CS FTIR spectrum Fig. S2a. The absorption peak at  $1570\text{ cm}^{-1}$  after polymerization is attributed to  $-\text{COO}-$  of PAA, and the absorption peak at  $1260\text{ cm}^{-1}$  is attributed to the bending and stretching vibrations of C-N, indicating that CS-*g*-PAA has been successfully formed. After adding AMPS, we found that the absorption peaks located at  $1658\text{ cm}^{-1}$ ,  $1553\text{ cm}^{-1}$  and  $1218\text{ cm}^{-1}$  are the characteristic absorption peaks of C=O stretching, N-H bending and S=O stretching<sup>1,2</sup>, which can further indicate that AMPS participates in the polymerization reaction. For the COSSC added samples (CS-*g*-P(AA-co-AMPS)/SMF/COSSC), a significant decrease in the absorption peaks of Si-OH and Si-O-Si at  $1048$  and  $468\text{ cm}^{-1}$  was clearly observed. It may be that Si-OH in COSSC can form hydrogen bonds with hydrophilic groups ( $-\text{COOH}$ ,  $\text{NH}_2$ ,  $-\text{SO}_3$ , etc) in the polymerization system Fig. S2b. The above FTIR experimental data provide clear evidence for the graft copolymerization of AA and AMPS on chitosan chains.

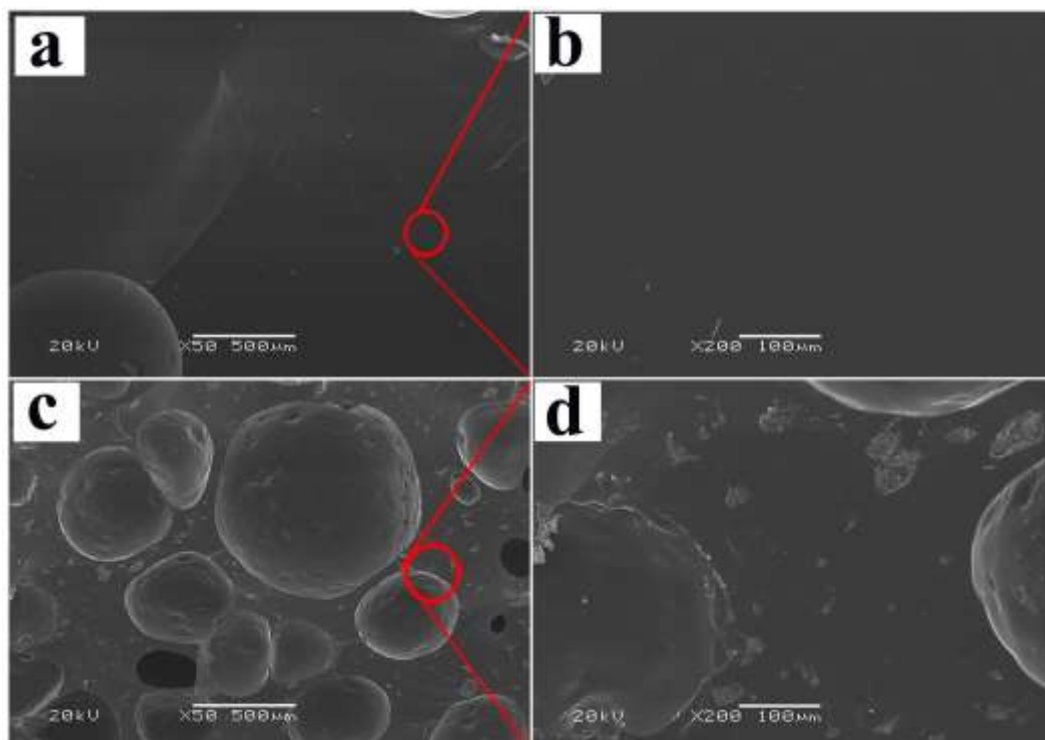

**Fig. S3** SEM images of CS-g-P(AA-co-AMPS)/SMP (a, b) and CS-g-P(AA-co-AMPS)/SMF/COSSC by conventional redox polymerization (without foaming) (d, c).

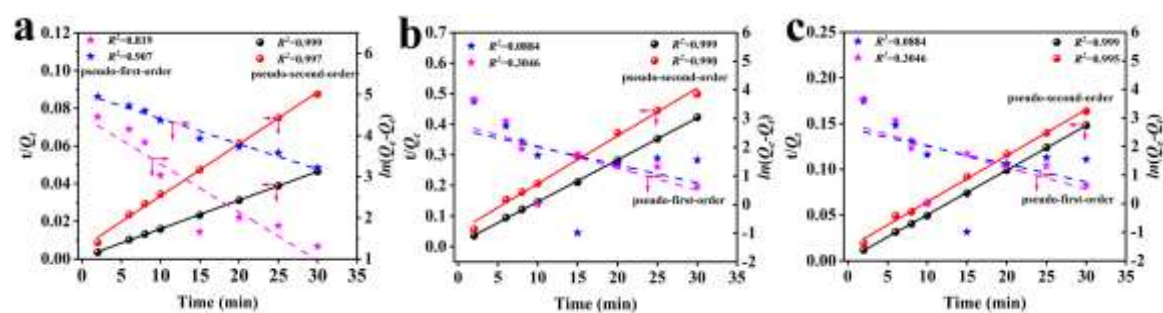

**Fig. S4** Fitting curves in distilled water (a), 0.9 wt.% NaCl solution (b), and in tap water (c), Other test conditions are as follows: ( $m_{\text{sample}} = 0.05 \text{ g}$ ;  $V_{\text{H}_2\text{O}} = 400 \text{ mL}$ ;  $\text{pH} = 7$ ; Time = 4 h).

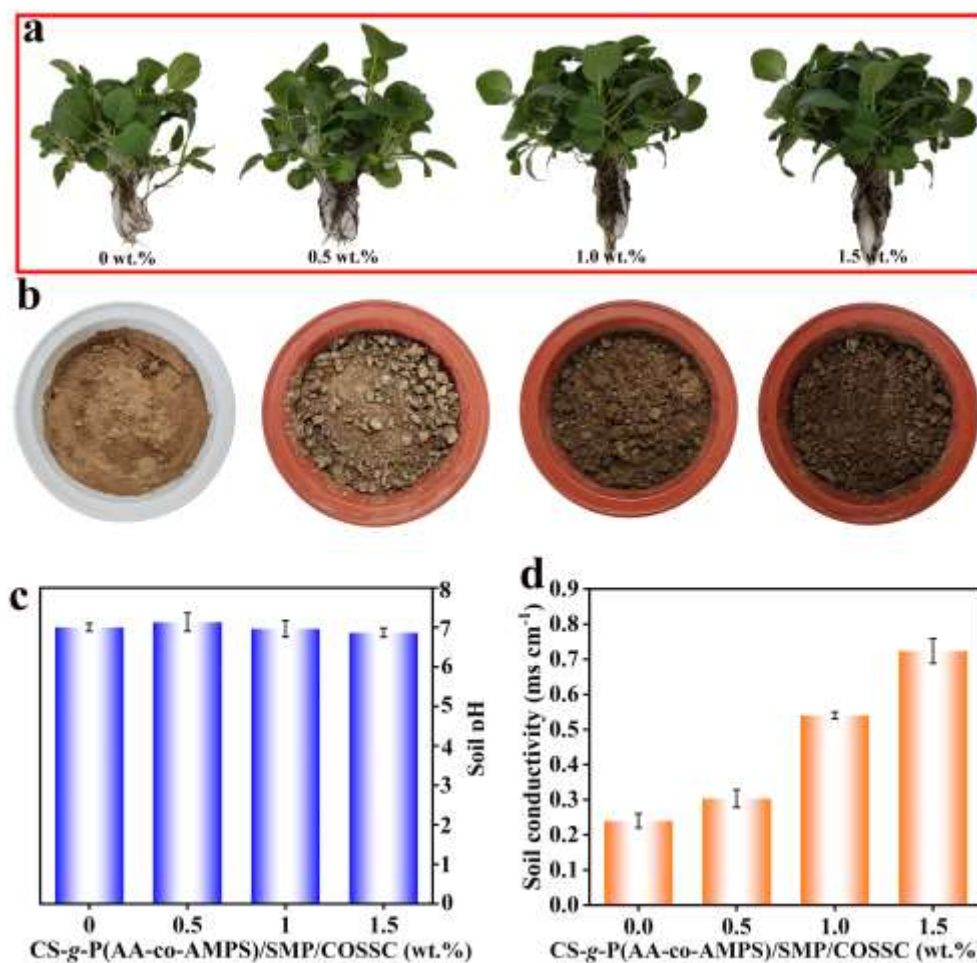

**Fig. S5** Digital photographs of cabbage seeds with different CS-g-P(AA-co-AMPS)/SMP/COSSC (a); Soil aridity under, soil pH and soil conductivity under different CS-g-P(AA-co-AMPS)/SMP/COSSC additions (b), (c) and (d).

**Table S1** Swelling kinetic parameters of CS-g-P(AA-co-AMPS)/SMP/COSSC in distilled water, 0.9 wt.% NaCl solution and in tap water.

| Sample                  | In distilled water |                                | In 0.9 wt.% NaCl |                                | In tap water    |                                |
|-------------------------|--------------------|--------------------------------|------------------|--------------------------------|-----------------|--------------------------------|
|                         | $q_{cal}$ (g/g)    | $K_1 \times 10^{-3}$ (g/g·min) | $q_{cal}$ (g/g)  | $K_1 \times 10^{-3}$ (g/g·min) | $q_{cal}$ (g/g) | $K_1 \times 10^{-3}$ (g/g·min) |
| No forming              | 363.636            | 1.189                          | 64.102           | 4.876                          | 198.019         | 1.817                          |
| Pickering foam template | 657.894            | 2.901                          | 72.886           | 19.88                          | 205.338         | 14.550                         |

**Table S2** Diffusion parameters of CS-*g*-P(AA-co-AMPS)/SMP/COSSC in distilled water, 0.9 wt.% NaCl solution and in tap water.

| Sample                  | In distilled water   |                | In 0.9 wt.% NaCl     |                | In tap water         |                |
|-------------------------|----------------------|----------------|----------------------|----------------|----------------------|----------------|
|                         | Intercept <i>lnk</i> | slope <i>n</i> | Intercept <i>lnk</i> | slope <i>n</i> | Intercept <i>lnk</i> | slope <i>n</i> |
| No forming              | 4.481                | 0.117          | 2.372                | 0.105          | 2.803                | 0.0764         |
| Pickering foam template | 5.035                | 0.061          | 0.097                | 2.505          | 2.634                | 0.0626         |

**Table S3** Germination of cabbage at different CS-*g*-P(AA-co-AMPS)/SMP/COSSC additions.

| CS- <i>g</i> -P(AA-co-AMPS)/SMP/COSSC | Germination rate |        |
|---------------------------------------|------------------|--------|
|                                       | 3 Day            | 5 Day  |
| 0 wt. %                               | 68.71%           | 89.71% |
| 0.5 wt. %                             | 68.28%           | 89.92% |
| 1.0 wt. %                             | 72.00%           | 91.07% |
| 1.5 wt. %                             | 71.42%           | 92.85% |

**Table S4** Chlorophyll content (mg/g fresh leaves) in cabbage seed.

| Samples   | Chlorophyll a | Chlorophyll b | Chlorophyll a + b |
|-----------|---------------|---------------|-------------------|
| Control   | 21.0789       | 11.7391       | 32.8080           |
| 0.5 wt. % | 21.1950       | 12.6337       | 33.8287           |
| 1 wt. %   | 22.0922       | 12.5085       | 34.6007           |
| 1.5 wt. % | 23.000        | 12.8311       | 35.8311           |

Reference:

1 Y. Bao, J. Ma and N. Li, *Carbohydr. Polym.* 2011, **84** (1), 76-82.

2 Y. Guo, R. Guo, X. Shi, S. Lian, Q. Zhou, Y. Chen, W. Liu and W. Li, *Int. J. Biol.*

*Macromol.* 2022, **209** (Pt A), 1169-1178.
